# Supplementary material for: Do anions influence the polarity of protic ionic liquids?
Source: Royal Society of Chemistry journal article supplement (doi:10.1039/c2cp23256a), 2011-12-23
Supplement: c2cp23256a.pdf [file c2cp23256a.pdf]

## ESI

### **Do Anions Influence the Polarity of Protic Ionic Liquids?**

Shashi Kant shukla, Nageshwar D. Khupse and Anil Kumar\*

National Chemical Laboratory, Pune 411 008 INDIA

[a.kumar@ncl.res.in](mailto:a.kumar@ncl.res.in)

(1)

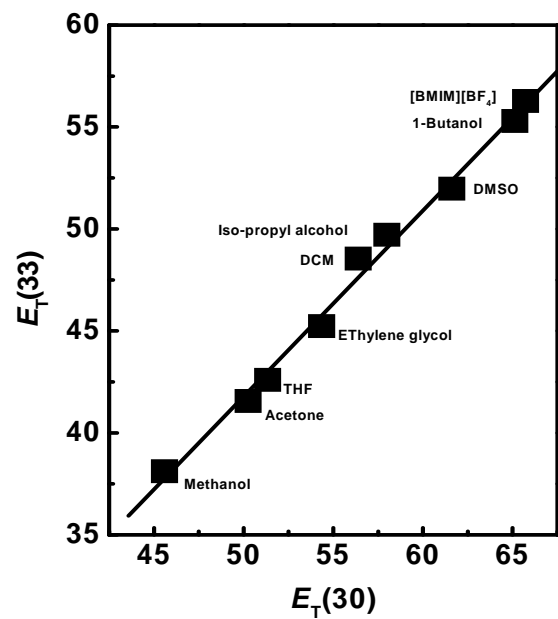

( $r = 0.99634$ ,  $SD = 0.57418$   $n = 9$ ,  $P = <0.0001$ )

A linear regression analysis between  $E_T(30)$  and  $E_T(33)$ .
